RESEARCH ARTICLE

# Advances in using Internet searches to track dengue

Shihao Yang<sup>1</sup>, Samuel C. Kou<sup>1\*</sup>, Fred Lu<sup>2</sup>, John S. Brownstein<sup>2,3</sup>, Nicholas Brooke<sup>4</sup>, Mauricio Santillana<sup>2,3\*</sup>

**1** Department of Statistics, Harvard University, Cambridge, MA, USA, **2** Computational Health Informatics Program, Boston Children's Hospital, Boston, MA, USA, **3** Harvard Medical School, Boston, MA, USA, **4** The Synergist, Brussels, Belgium

\* [msantill@g.harvard.edu](mailto:msantill@g.harvard.edu) (MS); [kou@stat.harvard.edu](mailto:kou@stat.harvard.edu) (SCK)

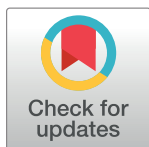

**OPEN ACCESS**

**Citation:** Yang S, Kou SC, Lu F, Brownstein JS, Brooke N, Santillana M (2017) Advances in using Internet searches to track dengue. *PLoS Comput Biol* 13(7): e1005607. <https://doi.org/10.1371/journal.pcbi.1005607>

**Editor:** Marcel Salathé, Ecole Polytechnique Federale de Lausanne, SWITZERLAND

**Received:** December 19, 2016

**Accepted:** June 2, 2017

**Published:** July 20, 2017

**Copyright:** © 2017 Yang et al. This is an open access article distributed under the terms of the [Creative Commons Attribution License](https://creativecommons.org/licenses/by/4.0/), which permits unrestricted use, distribution, and reproduction in any medium, provided the original author and source are credited.

**Data Availability Statement:** For replicability purposes, all the data used in this study is available at the Harvard Dataverse: [doi:10.7910/DVN/VMMC2A](https://doi.org/10.7910/DVN/VMMC2A). All the data used in this study were obtained through publicly available URLs. As described in the manuscript, the epidemiological information can be obtained in the following URLs: <http://www.epidemiologia.salud.gob.mx/anuario/html/anuarios.html> <http://portalsaude.saude.gov.br/index.php/79situacao-epidemiologica-dados-dengue> <http://www.boe.moph.go.th/boedb/surdata/disease.php?ds=66> [https://www.moh.gov.sg/content/moh\\_web/home/statistics/](https://www.moh.gov.sg/content/moh_web/home/statistics/)

## Abstract

Dengue is a mosquito-borne disease that threatens over half of the world's population. Despite being endemic to more than 100 countries, government-led efforts and tools for timely identification and tracking of new infections are still lacking in many affected areas. Multiple methodologies that leverage the use of Internet-based data sources have been proposed as a way to complement dengue surveillance efforts. Among these, dengue-related Google search trends have been shown to correlate with dengue activity. We extend a methodological framework, initially proposed and validated for flu surveillance, to produce near real-time estimates of dengue cases in five countries/states: Mexico, Brazil, Thailand, Singapore and Taiwan. Our result shows that our modeling framework can be used to improve the tracking of dengue activity in multiple locations around the world.

## Author summary

As communicable diseases spread in our societies, people frequently turn to the Internet to search for medical information. In recent years, multiple research teams have investigated how to utilize Internet users' search activity to track infectious diseases around our planet. In this article, we show that a methodology, originally developed to track flu in the US, can be extended to improve dengue surveillance in multiple countries/states where dengue has been observed in the last several years. Our result suggests that our methodology performs best in dengue-endemic areas with high number of yearly cases and with sustained seasonal incidence.

## Introduction

Dengue fever poses a growing health and economic problem throughout the tropical and subtropical world. Dengue is today one of the fastest-growing and most important mosquito-borne viral diseases in the world, with an estimated 390 million infections each year and threatening an estimated 3.9 billion people in 128 countries [1]. Infection often causes high

[infectiousDiseasesStatistics/weekly\\_infectiousdiseasesbulletin.html](http://infectiousDiseasesStatistics/weekly_infectiousdiseasesbulletin.html) <http://nidss.cdc.gov.tw/ch/SingleDisease.aspx?dc=1&dt=4&disease=94061&position=1> As described in the manuscript, the input variables (Google search frequencies for each country) can be obtained from the website: [www.google.com/trends](http://www.google.com/trends).

**Funding:** SY, FL, and MS were supported by a grant from the the Synergist, award 01-2016. SCK's research is supported in part by NSF grant DMS-1510446. The funders had no role in study design, data collection and analysis, decision to publish, or preparation of the manuscript.

**Competing interests:** The authors have declared that no competing interests exist.

fever and joint pain, and severe cases can lead to hemorrhage, shock and death. Dengue epidemics strain health services and lead to massive economic losses.

Dengue transmission is subject to complex environmental factors influencing the *Aedes aegypti* and *albopictus* mosquitoes which spread the disease. A mosquito is able to transmit dengue within a few weeks of contracting the virus, and a person bitten by such a mosquito will usually fall ill within a week, with symptoms lasting for up to 10 days afterward [2, 3]. There is a 5-day window when another mosquito can pick up the virus from an infected person [3]. The time scale of these transmission dynamics lends itself to tracking patterns of infection at a weekly or monthly level. Seasonal conditions such as temperature and precipitation can affect mosquito feeding rate, development, and lifespan, contributing to annual seasonality in observed dengue cases [4–8]. Other factors affecting the local or regional level include human population density and mobility, mosquito control efforts, and the distribution of the four dengue virus serotypes, adding complications to efforts to model transmission dynamics [9, 10].

Dengue mortality and morbidity both need to be addressed to reduce this heavy burden. The World Health Organization has called for better early case detection among other tactics to reduce dengue mortality, and for the reduction of dengue morbidity through coordinating epidemiological and entomological surveillance. Timely identification of outbreaks can inform and help preventative measures to lower infection rates, including mosquito population control and providing supplies such as screens and nets for mosquito bite prevention. Thorough, data-informed implementations of these vector control methods have been found effective in reducing case counts in many locations, but require sustainable investment to prevent resurgence [3, 11], highlighting the need for accurate and timely dengue surveillance tools.

However, such a comprehensive, effective and reliable disease surveillance system for dengue is not yet available. Governments traditionally rely on hospital-based reporting, a method that is often lagged and limited with frequent post-hoc revisions, due to communication inefficiencies across local and national agencies and the time needed to aggregate information from the clinical to the state level [12, 13]. This lack of timely information limits the identification and optimization of effective interventions. Measurement difficulties are compounded by the fact that a majority of dengue cases are asymptomatic [14].

In this context, building an effective disease surveillance tool is essential to being able to identify and assess the severity of dengue outbreaks and to enable better assessment of the effectiveness of ongoing interventions. Such tools should provide accurate and consistent measures of regional or national infection levels, be updated in near real-time, and be immune to bureaucratic or resource-related delays. To improve accuracy, these tools should use and link together multiple sources of information, using both traditional and non-traditional sources.

Over the years, a broad range of traditional epidemiological methods have been proposed by research teams to fill this time gap of information by supplementing official case counts with now-cast estimation using dengue incidence data from previous seasons. Autoregressive models, such as Seasonal Autoregressive Integrated Moving Average (SARIMA) model, that take into account recent and seasonal patterns, have been shown to produce useful disease estimates, some including additional variables such as concurrent weather information [15–19]. Other studies have further examined climate-driven models, finding associations of seasonal and long-term weather patterns such as El Niño with dengue levels in various countries [5, 20–22]. In addition, various mechanistic models on the dynamics of dengue transmission have also been explored, with some recent promise [23]. A comprehensive survey of these methods are given in Andraud et al. [24]

In parallel and complementary to the aforementioned methodologies, the global spread of the Internet has opened up the opportunity to investigate whether users' activity patterns on

Internet search-engines and social media platforms may lead to reasonable estimates of dengue infection levels [25–27]. In theory, Internet search tracking is consistent, efficient, and reflects real-time population trends, giving it strong potential to supplement current epidemiological methods [13, 28]. Studies have previously demonstrated the feasibility of using Internet search data to track dengue case counts [25, 27]. Google Dengue Trends (GDT), launched in 2011, was one of the first tools to quantitatively track dengue activity in multiple regions throughout the world by leveraging the aggregate Google search patterns of millions of users [25]. Since its start, the methodology behind GDT has been updated to address flaws found in its sister effort, Google Flu Trends [29–37], before finally being discontinued in August 2015. An assessment of GDT in Mexico showed mixed prediction accuracy compared to official case counts, with strong correlation in some states [38].

Despite progress in the use of both dengue time-series information (time series approaches [15]) and real-time Internet searches for dengue tracking [25], an approach for accurate tracking of dengue by combining the respective strengths of each data source has not been documented to the best of our knowledge. We extend a methodology recently introduced in the flu surveillance literature to combine dengue-related Google searches with dengue case count time-series to track dengue activity. Specifically, we evaluate the performance of the ARGO model (AutoRegressive model with GOogle search queries as exogenous variables), as introduced in [35], in tracking dengue in five countries/states around the globe: Mexico, Brazil, Thailand, Singapore, and Taiwan. These countries were chosen to explore the applicability of our approach in a diverse set of ecological situations where dengue has been identified as an important local threat. Our contribution shows that the lessons learned to track influenza in data-rich environments, like the United States, can be used to develop methodologies to track an often-neglected tropical disease, dengue, in data-poor environments.

## Materials and methods

### Data

We used two kinds of data sets for our study: (a) historical dengue incidence from government-led health agencies and (b) Google search fractions of dengue-related queries, aggregated at the national-level.

**Dengue time-series data.** *Mexico.* Monthly-aggregated dengue case counts data from January 2001 to August 2015 were obtained from Mexico’s Department of Epidemiology. <http://www.epidemiologia.salud.gob.mx/anuario/html/anuarios.html>

*Brazil.* Monthly dengue case counts data from January 2001 to December 2012 were obtained from the old website of Brazil’s Ministry of Health (<http://dtr2004.saude.gov.br/sinanweb/tabnet/dh?sinannet/dengue/bases/denguebrnet.def>) on July 14, 2015. This site is no longer accessible, since the Ministry has moved to a new website (<http://portalsaude.saude.gov.br/index.php/situacao-epidemiologica-dados-dengue>), which now publishes weekly dengue data from 2014-present. This site contains annual dengue cases since 1990 but no longer has the historical monthly data. We confirmed that the annual totals match the sum of case counts over each year in our dataset.

*Thailand.* Monthly dengue case count data from January 2003 to August 2015 were obtained from the Bureau of Epidemiology, Thailand (<http://www.boe.moph.go.th/boedb/surdata/disease.php?ds=66>). New data are published in an annual document available on the site.

*Singapore.* Weekly dengue case counts from January 10, 2004 to August 29, 2015 were obtained from the Singapore Ministry of Health and were aggregated into months.

[https://www.moh.gov.sg/content/moh\\_web/home/statistics/infectiousDiseasesStatistics/weekly\\_infectiousdiseasesbulletin.html](https://www.moh.gov.sg/content/moh_web/home/statistics/infectiousDiseasesStatistics/weekly_infectiousdiseasesbulletin.html).

*Taiwan.* Weekly dengue case counts from January 3, 2009 to March 19, 2016 were obtained from the Taiwan Ministry of Health and Welfare and were aggregated into months. <http://nidss.cdc.gov.tw/ch/SingleDisease.aspx?dc=1&dt=4&disease=061&position=1>.

**Online search volume data.** Google search fractions for dengue-related queries were obtained from Google Trends ([www.google.com/trends](http://www.google.com/trends)).

**Online search term selection.** While we initially intended to use Google Correlate ([www.google.com/correlate](http://www.google.com/correlate)), which is designed to identify search terms correlating highly with a given time series over a given country, we found this tool unreliable as many of the search terms returned were not related at all to dengue. Consequently, we used the Google Trends ([www.google.com/trends](http://www.google.com/trends)) tool to identify the top ten queries most highly correlated with the term ‘dengue’ in each country, ignoring terms unrelated to dengue (one feature of Google Trends is that in addition to the trends of a specific term, it gives the top query terms that are most highly correlated with the specific term). The monthly aggregated search fractions of these terms were then downloaded within the time period of interest for each country. The query terms used for each country in this study were later verified by native speakers of each language and are presented in Table A in [S1 Text](#).

## Methods

We used the multivariate linear regression modeling framework ARGO (AutoRegressive model with GOogle search queries as exogenous variables) [35], previously used to track flu incidence using flu-related Google searches, to combine information from historical dengue case counts and dengue-related Google search frequencies with the goal of estimating dengue activity one month ahead of the publication of official local health reports. ARGO uses a training set that consists of a two-year moving time window (immediately prior to the month of estimation) and an  $L_1$  regularization approach, to identify the best performing parsimonious model [39]. This moving window approach allows the model to constantly improve its predictive ability by capturing the changing relationship between Internet search behavior and dengue activity.

**ARGO model formulation.** Our ARGO model assumes that more dengue-related searches will be observed in times when more people are affected (either experiencing symptoms or hearing about someone who may have been infected) by the virus. This is formalized mathematically via a hidden Markov model in ARGO as explained in [35].

Let  $y_t = \log(c_t + 1)$  be the *log*-transformed dengue case counts  $c_t$  at time  $t$ , and  $X_{k,t}$  the *log*-transformed Google search frequency of query term  $k$  at time  $t$ . Then

$$y_t = \mu_y + \sum_{j \in J} \alpha_j y_{t-j} + \sum_{k \in K} \beta_k X_{k,t} + \epsilon_t, \quad \epsilon_t \stackrel{iid}{\sim} \mathcal{N}(0, \sigma^2), \quad (1)$$

where  $J$  is the set of auto-regressive lags,  $K$  is the set of Google query terms, and  $X_t$  can be thought of as the exogenous variables to time series  $\{y_t\}$  as introduced in [35].

**ARGO model parameter estimation.** We take  $J = \{1, \dots, 12\} \cup \{24\}$ , i.e.,  $J$  consists of the most recent 12 months and the month exactly two years ago. Such choice of  $J$  captures the influence of short and mid-term yearly fluctuations, as well as long-term seasonality previously shown to have strong predictive power in dengue [15]. We take  $K = 10$ , corresponding to the top ten dengue-related search terms as described in the data subsection.

We impose  $L_1$  regularity for parameter estimation. In a given month, the goal is to find parameters  $\mu_y$ ,  $\alpha = \{\alpha_j; j \in J\}$ , and  $\beta = (\beta_1, \dots, \beta_{10})$  that minimize

$$\sum_t \left( y_t - \mu_y - \sum_{j \in J} \alpha_j y_{t-j} - \sum_{k=1}^{10} \beta_k X_{k,t} \right)^2 + \sum_{j \in J} \lambda_{\alpha_j} |\alpha_j| + \sum_{k=1}^{10} \lambda_{\beta_k} |\beta_k| \quad (2)$$

where  $\lambda_{\alpha_j}$ ,  $\lambda_{\beta_k}$  are regularization hyper-parameters.

For a given time window, ARGO automatically selects the most relevant variables to generate an out-of-sample dengue activity estimate. This is achieved by zeroing out regression coefficients of terms that contribute little (or have redundant information) to the estimation. This approach leads to interpretable results by allowing us to clearly identify which variables had a role in detection for each month.

All statistical analyses were performed with R, version 3.2.4.

## Benchmark models

For comparison with ARGO, we included estimation results from five alternative methods. These are:

1. A seasonal autoregressive model without Google information, denoted as SAR, using a time series of the most recent 3 lags, as well as 2 seasonal lags. Specifically, the monthly time series model is comprised of time lags 1,2,3,12,24:  $y_t = \alpha_1 y_{t-1} + \alpha_2 y_{t-2} + \alpha_3 y_{t-3} + \alpha_{12} y_{t-12} + \alpha_{24} y_{t-24} + \epsilon_t$ ,  $\epsilon_t \sim \mathcal{N}(0, \sigma^2)$ . This model serves as a baseline for estimates made only using dengue time-series information.
2. Google Dengue Trends [25], which ended in August 2015. Data are obtained from <https://www.google.org/flutrends/about/>. Because Google Dengue Trends reported dengue intensity in a scale from 0 to 1, we dynamically rescaled it using a sliding training window to recreate case estimates.
3. A penalized multivariate linear regression model with Google Trends information only [34], denoted as GT. This is essentially ARGO without autoregressive lags, and incorporates a common  $L_1$  penalty on the Google Trends data;
4. A seasonal autoregressive model *with* Google Dengue Trends as exogenous variable, denoted as SAR+GDT.  $y_t = \alpha_1 y_{t-1} + \alpha_2 y_{t-2} + \alpha_3 y_{t-3} + \alpha_{12} y_{t-12} + \alpha_{24} y_{t-24} + \beta \log \text{GDT}_t + \epsilon_t$ ,  $\epsilon_t \sim \mathcal{N}(0, \sigma^2)$ .
5. A naive method, which simply uses the case count at the previous month as the guess for the value of the current month.

All benchmark models (except the naive method) were trained by linear regression with sliding two year windows for fair comparison.

## Accuracy metrics

We used five accuracy metrics to compare model performance: root mean squared error (RMSE), mean absolute error (MAE), root mean squared percentage error (RMSPE), mean absolute percentage error (MAPE), and Pearson correlation.

Mathematically, these accuracy metrics of estimator  $\hat{c}$  for target dengue case count  $c$  are defined as,  $\text{RMSE} = [1/n \sum_{t=1}^n (\hat{c}_t - c_t)^2]^{1/2}$ ,  $\text{MAE} = 1/n \sum_{t=1}^n |\hat{c}_t - c_t|$ ,  $\text{RMSPE} = \{1/n \sum_{t=1}^n [(\hat{c}_t - c_t)/c_t]^2\}^{1/2}$ ,  $\text{MAPE} = 1/n \sum_{t=1}^n |\hat{c}_t - c_t|/c_t$ .

## Retrospective estimations

Retrospective out-of-sample estimates of dengue case counts were generated for each country using ARGO and the five benchmark models, assuming we only had access to information available at the time of estimation. The time windows in which we assessed the performance of our dengue estimates for each country were chosen based on the availability of official and GDT benchmark data.

These time windows are: Brazil from Mar 2006–Dec 2012, Mexico from Mar 2006–Aug 2015, Thailand from Oct 2010–Aug 2015, Singapore from Feb 2008–Aug 2015, and Taiwan from Jan 2013–Mar 2016.

## Results

In four of the five countries/states, Brazil, Mexico, Thailand and Singapore, ARGO outperformed all benchmark models across essentially all accuracy metrics (RMSE, MAE, RMSPE, MAPE, correlation). See [Table 1](#). In particular, by incorporating information from the Internet searches and the dengue time-series, ARGO achieved better results than using either information alone. This accuracy improvement is reflected in the decreased errors during both peaks of dengue activity and off-season/periods with low levels of infection. See [Fig 1](#). Unlike the seasonal autoregression with GDT model (SAR+GDT), ARGO avoided the significant over-shooting problem that has been previously noted in Google Trends data ([\[35\]](#), [\[40\]](#)). This is especially notable between 2006–2008 and 2012–2014 in Mexico, and 2006–2010 in Brazil.

Taiwan shows notably different results. Of all the available models, the naive and seasonal autoregressive models have the best performance, but neither is clearly effective. The naive model has the lowest RMSE and MAE, but the worst RMSPE, MAPE and correlation, while the seasonal model shows the best RMSPE, MAPE and correlation. In comparison, the other models have a much greater RMSE to MAE ratio, indicating worse performance during high prevalence relative to the naive model. ARGO does not outperform the benchmarks in this case.

This result seems to reflect the distinct case count pattern in Taiwan compared to the other countries. Taiwan experienced little to no dengue prevalence for years until two epidemic spikes occurred in 2014 and 2015. In contrast, the other countries experience seasonal fluctuations of dengue over their entire estimation windows. This lack of predictability may be the reason that both seasonal and Google Trends-based models have greater error than the naive model, significantly over-estimating the 2015 peak for example. Yet overall, these methods show greater correlation than the naive method, perhaps because they are more responsive. Because ARGO over-estimates to a greater extent than the autoregressive methodology, this again reflects previous observations on the tendency of Google data to overshoot.

ARGO dynamically adjusts weights of dengue time-series and Google Trends data to best fit the most recent dengue behavior (See [Fig. A, B, C, D, and E in S1 Text](#)).

## Discussion

Our findings confirm that combining historical dengue incidence information with dengue-related Google search data, in a self-adjusting manner, leads to better near real-time dengue activity estimates than those obtained with previous methodologies that exploit the information separately. This also confirms that the hidden Markov model framework used by ARGO is appropriate in this context [\[35\]](#).

ARGO's uniform out-performance of other benchmark methods for Mexico, Brazil, Thailand, and Singapore demonstrates its robustness and broad applicability. ARGO achieves this by balancing the influence of Internet search data, which quickly change in the face of

**Table 1. Comparison of ARGO to benchmark models across countries and evaluation metrics.** The bold face value is the best value among all methods according to each performance metric. Google Dengue Trends was not published for Taiwan and therefore the GDT benchmark is not available for Taiwan. The assessment period for the five regions, chosen based on the common available periods for all methods, are: Brazil (Mar 2006–Dec 2012), Mexico (Mar 2006–Aug 2015), Thailand (Oct 2010–Aug 2015), Singapore (Feb 2008–Aug 2015), Taiwan (Jan 2013–Mar 2016). The error value is relative to the naive, whose absolute error value is reported in the parenthesis.

|                  | RMSE                | MAE                 | RMSPE        | MAPE         | CORR         |
|------------------|---------------------|---------------------|--------------|--------------|--------------|
| <b>Brazil</b>    |                     |                     |              |              |              |
| ARGO             | <b>0.394</b>        | <b>0.369</b>        | <b>0.397</b> | <b>0.389</b> | <b>0.971</b> |
| GDT              | 0.666               | 0.633               | 0.984        | 0.817        | 0.916        |
| GT               | 0.902               | 0.829               | 0.877        | 0.838        | 0.861        |
| SAR              | 0.660               | 0.563               | 0.664        | 0.583        | 0.917        |
| SAR+GDT          | 0.629               | 0.587               | 0.564        | 0.560        | 0.938        |
| naive            | 1 (30560.436)       | 1 (21677.634)       | 1 (0.703)    | 1 (0.546)    | 0.812        |
| <b>Mexico</b>    |                     |                     |              |              |              |
| ARGO             | <b>0.680</b>        | <b>0.651</b>        | <b>0.558</b> | <b>0.678</b> | <b>0.924</b> |
| GDT              | 0.944               | 0.961               | 1.270        | 1.311        | 0.863        |
| GT               | 0.950               | 0.927               | 1.097        | 1.100        | 0.861        |
| SAR              | 0.790               | 0.737               | 0.776        | 0.815        | 0.911        |
| SAR+GDT          | 1.249               | 0.986               | 0.779        | 0.854        | 0.891        |
| naive            | 1 (3570.105)        | 1 (2161.018)        | 1 (0.816)    | 1 (0.492)    | 0.833        |
| <b>Thailand</b>  |                     |                     |              |              |              |
| ARGO             | <b>0.715</b>        | <b>0.715</b>        | <b>0.708</b> | <b>0.706</b> | <b>0.928</b> |
| GDT              | 0.880               | 0.868               | 1.494        | 1.284        | 0.884        |
| GT               | 1.364               | 1.224               | 1.510        | 1.368        | 0.833        |
| SAR              | 0.774               | 0.836               | 0.906        | 0.898        | 0.917        |
| SAR+GDT          | 1.157               | 0.983               | 0.923        | 0.936        | 0.903        |
| naive            | 1 (2058.891)        | 1 (1276.068)        | 1 (0.426)    | 1 (0.326)    | 0.852        |
| <b>Singapore</b> |                     |                     |              |              |              |
| ARGO             | <b>0.893</b>        | <b>0.889</b>        | <b>0.931</b> | <b>0.917</b> | <b>0.903</b> |
| GDT              | 1.182               | 1.285               | 1.427        | 1.439        | 0.821        |
| GT               | 1.287               | 1.165               | 1.287        | 1.254        | 0.796        |
| SAR              | 1.153               | 1.104               | 1.166        | 1.087        | 0.847        |
| SAR+GDT          | 2.452               | 1.297               | 1.185        | 1.009        | 0.775        |
| naive            | 1 (329.318)         | 1 (202.651)         | 1 (0.283)    | 1 (0.230)    | 0.878        |
| <b>Taiwan</b>    |                     |                     |              |              |              |
| ARGO             | 2.180               | 1.264               | <b>0.233</b> | <b>0.359</b> | 0.834        |
| GT               | 12.211              | 4.904               | 1.069        | 0.898        | 0.724        |
| SAR              | 1.852               | 1.397               | 0.247        | 0.408        | <b>0.878</b> |
| naive            | <b>1 (2422.559)</b> | <b>1 (1063.597)</b> | 1 (3.248)    | 1 (1.601)    | 0.734        |

<https://doi.org/10.1371/journal.pcbi.1005607.t001>

outbreaks, and auto-regressive information, which tempers the estimations to mitigate the problem of overshooting. The application of an  $L_1$  regularization approach [34, 35, 39] helps identify the query terms most relevant to estimation at any given time, providing easy-to-interpret information as shown in the heatmaps in Figures A, B, C, D, and E in [S1 Text](#). ARGO dynamically trains on a two-year rolling window, allowing model parameters to adjust over time to account for changes in Internet users' behavior. The success of our methodology is based on the intuition that the more people are affected by dengue, the higher the number of dengue-related searches will be during an outbreak, and therefore the more likely Google query information will be useful at detecting dengue activity. This is observed in our findings,

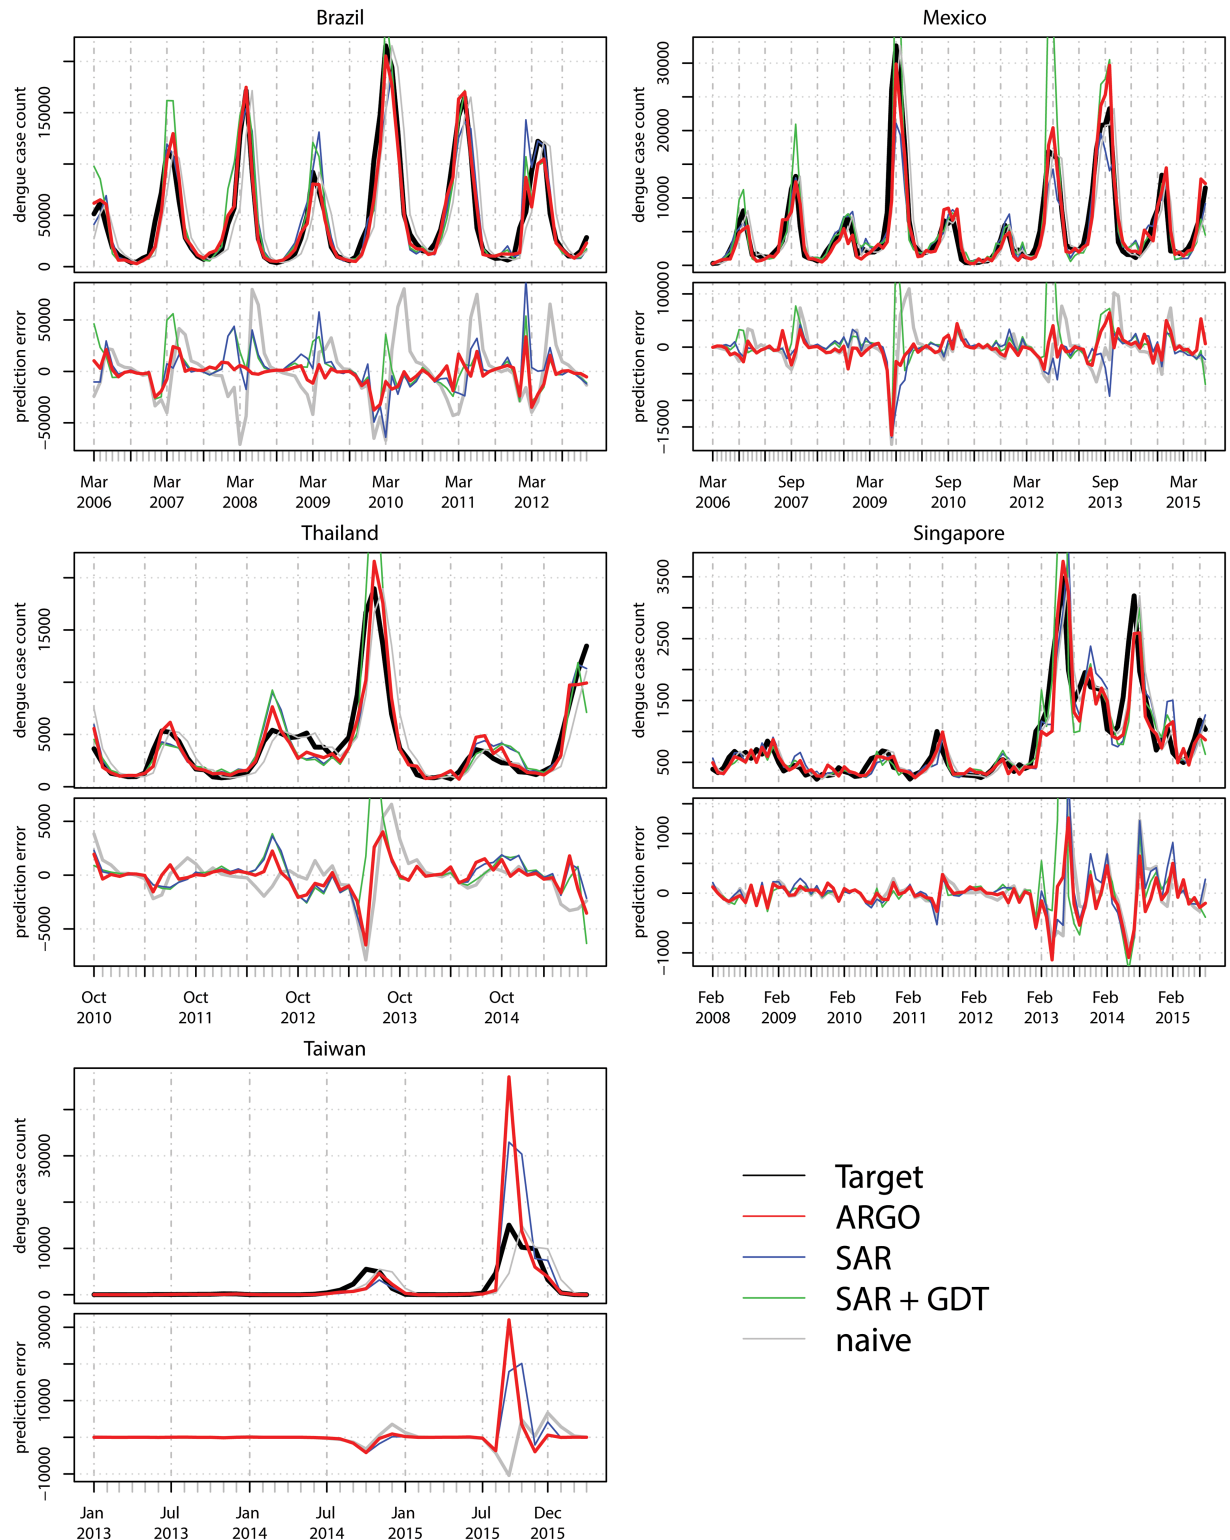

**Fig 1. Estimation results.** Monthly dengue case-count estimations are displayed for all studied countries for four different estimation methodologies: ARGO, a seasonal auto-regressive model with and without Google Dengue Trends information (SAR+GDT, and SAR, respectively), and a naive detection that estimates current month case counts using the last month's observed cases. Historical dengue case counts, as reported by local health authorities, are shown for reference (black line), as well as the corresponding estimation errors associated to each methodology when compared to the reference.

<https://doi.org/10.1371/journal.pcbi.1005607.g001>



**Table 2. Comparison of countries/states.**

| <i>Characteristics</i>                          | <b>Brazil</b> | <b>Mexico</b> | <b>Thailand</b> | <b>Singapore</b> | <b>Taiwan</b> |
|-------------------------------------------------|---------------|---------------|-----------------|------------------|---------------|
| ARGO correlation                                | 0.971         | 0.924         | 0.928           | 0.903            | 0.834         |
| Median yearly case count                        | 590,000       | 48,000        | 47,000          | 5,400            | 1,700         |
| Seasonality (correlation of SAR)                | 0.917         | 0.911         | 0.917           | 0.847            | 0.878         |
| Internet penetration [41]                       | 50%           | 38%           | 27%             | 74%              | 76%           |
| Google market share [42]                        | 97%           | 93%           | 99%             | 84%              | 42%           |
| Report frequency                                | monthly       | monthly       | monthly         | weekly           | weekly        |
| Population (avg. in millions) [43, 44]          | 198           | 120           | 67              | 5.2              | 23            |
| Median yearly incidence (per 10,000)            | 29.1          | 4.1           | 8.0             | 10.5             | 6.8           |
| Country size (10 <sup>3</sup> mi <sup>2</sup> ) | 3,290         | 758           | 198             | 0.28             | 14            |
| Population density (per mi <sup>2</sup> ) [43]  | 60            | 160           | 340             | 18,700           | 1,600         |
| GDP (per capita avg. over study period) [43]    | \$10,100      | \$9,200       | \$5,800         | \$55,000         | \$31,900      |

<https://doi.org/10.1371/journal.pcbi.1005607.t002>

where the median yearly dengue case counts are strongly associated with the performance of our methodology (i.e. the higher the median yearly cases the higher the correlation of ARGO), as shown in Table 2. This is consistent with earlier findings that dengue virus prevalence is correlated with model performance in sub-regions of Mexico [38]. In addition, in Brazil, Mexico, and Thailand, the countries where our methodology works best, a clear seasonal pattern is observed in the disease incidence trends over time, as shown in Table 2.

On the other hand, the results from Taiwan illustrate the limitations of our approach. Taiwan does not present either an observable seasonal trend or a high number of dengue cases. As a result, neither ARGO nor the model using only Google search terms reliably track dengue. Low dengue-related Internet search activity during most years and sudden public interest during the outbreaks of 2014 and 2015, causing mis-calibration of the Google Trends data, may be another contributor. Other unique characteristics of the Taiwan outbreaks are that they were largely localized in South Taiwan, where *Aedes aegypti* is resident, and featured viral strains from neighboring countries rather than endemic strains [45, 46]. Also of interest is that the increased case counts occurred during periods of significantly increased temperature and rainfall [46]. The unpredictable character of these outbreaks present challenges for the performance of ARGO, and generally of all the methods considered in our comparison, but also highlight the potential of incorporating environmental predictors such as temperature and precipitation in our approaches.

While Internet penetration may seem to be an important factor in assessing the quality of Google Trends data, the statistics from Table 2 show that it alone is not as effective as dengue prevalence or seasonality in predicting the overall performance of our methodology. As an example, although Taiwan has high Internet penetration, the dengue case count may be low enough over most years that dengue-related searches motivated by other medical or educational purposes may introduce significant noise in the Google-query data. On the other hand, ARGO shows strong improvement over the seasonal autoregressive model in Brazil and Singapore, two countries with moderate to high Internet access, compared to Mexico and Thailand, which have low Internet access, suggesting that web penetration is nevertheless still an important factor. Finally, the proportion of the population within a country using Google as a search engine also provides some insight into the performance of ARGO (Table 2). ARGO shows the lowest correlation in Taiwan, which happens to have the lowest Google market share among the countries studied here [42].

Despite dengue and flu having very different biological transmission patterns, the fact that modifications to the ARGO methodology yield robust and accurate dengue estimates indicates

the strength of our methodological framework. Although the monthly time scale chosen for this study was originally chosen based on data availability, inspection shows that a monthly surveillance approach is better suited for the 2-week serial interval of dengue [47].

The dengue activity estimates obtained with our methodology, like estimates from any novel digital disease detection tool, are not meant to replace dengue information obtained from traditional healthcare-based disease surveillance; instead, they can help decision-makers confirm (or deny) suspected disease trends ahead of traditional disease surveillance systems. Ultimately, the goal of this effort is to take a step closer to the development of an accurate, real-time modeling platform, where dengue case estimates can be constantly updated to provide authorities and non-governmental organizations with potentially actionable and close to real-time data on which they can make informed decisions, as well as providing travelers visiting high-risk areas with warnings. Such a platform could bring multiple information sources together, including but not limited to traditional epidemiological case reports, Google searches, crowd-sourced data, and climate and transportation information, creating a rapid response and alert system for users based on their specific location. Timely and precise detection may turn out to play a large role in reducing infections in the near future by influencing the timing of vector control efforts, hospital and clinical preparation, and providing public and individual alerts.

The platform would also enable users to verify dengue risk information with their own observations, creating a positive feedback loop that would continuously improve the accuracy of the tool. We are currently implementing two building-blocks that could help shape such a platform. The first one consists of a webpage [Healthmap.org/denguetrends](http://Healthmap.org/denguetrends) where dengue estimates produced with the methodology introduced in this manuscript are continuously displayed, and the second one is a crowd-sourced tool (currently in beta) that offers a user-friendly online chat system which maps dengue cases worldwide, and gives the public free access to toolkits that help reduce their risk of infection. This second effort is led by Break Dengue's "Dengue Track" initiative [www.breakdengue.org/dengue-track/](http://www.breakdengue.org/dengue-track/). The potential impact may be far reaching, as the same models could also be used to track and map other infectious and mosquito-borne diseases, like Zika, malaria, yellow fever or Chikungunya.

Real-time implementation of our methods requires robust responses to changes in data quality, availability, and format. For example, Google correlate data shows internal variability attributed to re-sampling when the tool is accessed at different times. In addition, epidemiological data is not always published consistently by countries, creating lags in reporting that would make our methodology (which assumes having access to last month's dengue case counts) not applicable.

In order to understand the impact of these data limitations, we performed two robustness studies of ARGO with respect to (1) the variations in Google Trends data, and (2) the availability of the most recent dengue case count data. For the first, we obtained multiple data sets containing the search frequencies of the query terms displayed on Table A in [S1 Text](#) by accessing Google Trends 10 different times during a week. We then produced Dengue activity estimates with ARGO using these 10 data sets as input. Table B in [S1 Text](#) shows that ARGO still outperforms all other methods in Brazil, Mexico, Thailand and Singapore, despite the random variations observed in Google Trends data. For the second, we retrained all the models under the assumption that the dengue case count from the past month was never available due to reporting delays. Table C in [S1 Text](#) shows that despite the unavailability of the last month dengue counts, ARGO had competitive predictive performance in the five countries/states when compared to other models (similar to the full data case), suggesting that our methodology is robust to the time delays in reporting in addition to variations in the input variables.

While our methods are designed to self-correct over time, the introduction of an intervention to curb dengue activity that could lead to a reduction in dengue cases, such as vector control or behavioral education (e.g. use of bed nets), may potentially lead our models to temporarily over-predict incidence. However, once such an intervention has been established and remains active in a given location, our models will self-correct over time to predict the new levels of dengue activity. Sporadic, nation-wide mosquito control methods would provide a bigger challenge to dengue case count predictability and, therefore, our model's usability.

In light of ARGO's strengths and limitations, future work should analyze the feasibility of applying our methodology to other countries, finer spatial resolutions, and temporal resolutions. This will be followed by routine reassessments of our methods to identify changes in information or potential improvements, including new search terms. As an example of such a change, Brazil has started publishing weekly dengue case counts since 2014. While our work used only the monthly resolution for fair comparison among all countries, adapting our methods to shorter time horizons for regions that provide such information would be useful.

Information on national-level dengue activity may not be ideal for decision-making at the local level since this information has been aggregated over a wide variety of potentially heterogeneous spatial environments. Future work should explore finer spatial resolution estimations to identify whether region-specific factors may improve or worsen results, similar to what has been done in [15, 38]. The five countries/states explored in this study vary on orders of magnitudes of size; for example, Brazil, Mexico, and Thailand each spans over 100 million square miles. As a result, these three countries contain wide ecological diversity and potentially varying patterns of dengue transmission among different sub-regions. It may be expected, for example, that Brazil would show different levels of seasonality in tropical compared to temperate areas. The success of finer spatial resolutions would depend on the quality of local case count and Google Trends data; the former can be affected by reporting efficiency, and the latter can be subject to Internet availability and Google use in a given region. Using national level data, on the other hand, has the advantage of smoother incidence curves for extraction and extrapolation of signal at the cost of more granular information. This is reflected in the observation that ARGO performed best in the three large countries despite the inherent heterogeneity within each country. This fits with our previous observation that a combination of higher dengue prevalence at the national level, seasonality and Google use in these countries leads to better results. We believe that these strengths and limitations also apply to extending our methodology to other countries/states besides those studied in the paper.

Producing short-term forecasts of dengue activity, in addition to the nowcast presented here should also be pursued (See [48] for such an extension for flu forecasting). Our approach may help produce dengue activity estimates in higher spatial resolutions that can lead to alert systems for people with an increased risk of exposure to the dengue virus at any given point in time. It is important to keep in mind that state-level or city-level spatial scales with low dengue activity may present similar challenges to the applicability of our approach as seen in Taiwan. The incorporation of other Internet-based data sources [48, 49] and cross-country spatial relationships should also be exploited in order to improve the accuracy in predictions.

## Supporting information

**S1 Text. Supporting information text.** This file includes: (1) Query terms used for each country/state as Table A; (2) ARGO hyper-parameters for each country/state; (3) Aggregation from weekly data to monthly data; (4) Robustness to Google Trends variation as Table B; (5) Sensitivity to the availability of dengue case count in the past month as Table C; (6) Heatmaps of

ARGO coefficients for each country/state as Figure A, B, C, D, and E. (PDF)

## Author Contributions

**Conceptualization:** SCK JSB NB MS.

**Data curation:** SY FL.

**Formal analysis:** SY SCK FL MS.

**Funding acquisition:** NB MS.

**Investigation:** SY SCK FL MS.

**Methodology:** SY SCK FL MS.

**Project administration:** SCK MS.

**Software:** SY FL.

**Supervision:** SCK MS.

**Validation:** SY SCK FL MS.

**Visualization:** SY FL.

**Writing – original draft:** SY SCK FL MS.

**Writing – review & editing:** SY SCK FL JSB NB MS.

## References

1. World Health Organization. Dengue and severe dengue; 2016. <http://www.who.int/mediacentre/factsheets/fs117/en/>.
2. Chan M, Johansson MA. The incubation periods of dengue viruses. *PloS one*. 2012; 7(11):e50972. <https://doi.org/10.1371/journal.pone.0050972> PMID: 23226436
3. Centers for Disease Control and Prevention. Dengue; 2016. <http://www.cdc.gov/dengue/>.
4. Ibarra AMS, Ryan SJ, Beltrán E, Mejía R, Silva M, Muñoz Á. Dengue vector dynamics (*Aedes aegypti*) influenced by climate and social factors in Ecuador: implications for targeted control. *PloS one*. 2013; 8(11):e78263. <https://doi.org/10.1371/journal.pone.0078263>
5. Hii YL, Zhu H, Ng N, Ng LC, Rocklöv J. Forecast of dengue incidence using temperature and rainfall. *PLoS Negl Trop Dis*. 2012; 6(11):e1908. <https://doi.org/10.1371/journal.pntd.0001908> PMID: 23209852
6. Wongkoon S, Jaroensutasinee M, Jaroensutasinee K, et al. Distribution, seasonal variation & dengue transmission prediction in Sisaket, Thailand. *Indian Journal of Medical Research*. 2013; 138(3):347. PMID: 24135179
7. Thai KTD, Anders KL. The role of climate variability and change in the transmission dynamics and geographic distribution of dengue. *Experimental Biology and Medicine*. 2011; 236(8):944–954. <https://doi.org/10.1258/ebm.2011.010402> PMID: 21737578
8. Yang HM, Macoris MLG, Galvani KC, Andrighetti MTM, Wanderley DMV. Assessing the effects of temperature on the population of *Aedes aegypti*, the vector of dengue. *Epidemiology and Infection*. 2009; 137(08):1188–1202. <https://doi.org/10.1017/S0950268809002052> PMID: 19192322
9. Padmanabha H, Durham D, Correa F, Diuk-Wasser M, Galvani A. The interactive roles of *Aedes aegypti* super-production and human density in dengue transmission. *PLoS Negl Trop Dis*. 2012; 6(8):e1799. <https://doi.org/10.1371/journal.pntd.0001799> PMID: 22953017
10. Thammapalo S, Chongsuvivatwong V, Geater A, Dueravee M. Environmental factors and incidence of dengue fever and dengue haemorrhagic fever in an urban area, Southern Thailand. *Epidemiology and Infection*. 2008; 136(01):135–143. <https://doi.org/10.1017/S0950268807008126> PMID: 17359563

11. Achee NL, Gould F, Perkins TA, Reiner RC Jr, Morrison AC, Ritchie SA, et al. A critical assessment of vector control for dengue prevention. *PLoS Negl Trop Dis*. 2015; 9(5):e0003655. <https://doi.org/10.1371/journal.pntd.0003655> PMID: 25951103
12. Runge-Ranzinger S, Horstick O, Marx M, Kroeger A. What does dengue disease surveillance contribute to predicting and detecting outbreaks and describing trends? *Tropical Medicine & International Health*. 2008; 13(8):1022–1041. <https://doi.org/10.1111/j.1365-3156.2008.02112.x>
13. Madoff LC, Fisman DN, Kass-Hout T. A new approach to monitoring dengue activity. *PLoS neglected tropical diseases*. 2011; 5(5). <https://doi.org/10.1371/journal.pntd.0001215> PMID: 21647309
14. World Health Organization and Special Programme for Research and Training in Tropical Diseases, World Health Organization E Department of Control of Neglected Tropical Diseases, World Health Organization. Dengue: guidelines for diagnosis, treatment, prevention and control. World Health Organization; 2009.
15. Johansson MA, Reich NG, Hota A, Brownstein JS, Santillana M. Evaluating the performance of infectious disease forecasts: A comparison of climate-driven and seasonal dengue forecasts for Mexico. *Scientific Reports*. 2016; 6. <https://doi.org/10.1038/srep33707>
16. Promprou S, Jaroensutasinee M, Jaroensutasinee K. Forecasting dengue haemorrhagic fever cases in Southern Thailand using ARIMA Models. *Dengue Bulletin*. 2006; 30:99.
17. Luz PM, Mendes BVM, Codeço CT, Struchiner CJ, Galvani AP. Time series analysis of dengue incidence in Rio de Janeiro, Brazil. *The American journal of tropical medicine and hygiene*. 2008; 79(6):933–939. PMID: 19052308
18. Choudhury ZM, Banu S, Islam AM. Forecasting dengue incidence in Dhaka, Bangladesh: A time series analysis. 2008;.
19. Eastin MD, Delmelle E, Casas I, Wexler J, Self C. Intra- and interseasonal autoregressive prediction of dengue outbreaks using local weather and regional climate for a tropical environment in Colombia. *The American journal of tropical medicine and hygiene*. 2014; 91(3):598–610. <https://doi.org/10.4269/ajtmh.13-0303> PMID: 24957546
20. Johansson MA, Cummings DAT, Glass GE. Multiyear climate variability and dengue—El Niño southern oscillation, weather, and dengue incidence in Puerto Rico, Mexico, and Thailand: a longitudinal data analysis. *PLoS Med*. 2009; 6(11):e1000168. <https://doi.org/10.1371/journal.pmed.1000168> PMID: 19918363
21. Hurtado-Díaz M, Riojas-Rodríguez H, Rothenberg SJ, Gomez-Dantés H, Cifuentes E. Short communication: impact of climate variability on the incidence of dengue in Mexico. *Tropical medicine & international health*. 2007; 12(11):1327–1337. <https://doi.org/10.1111/j.1365-3156.2007.01930.x>
22. Lu L, Lin H, Tian L, Yang W, Sun J, Liu Q. Time series analysis of dengue fever and weather in Guangzhou, China. *BMC Public Health*. 2009; 9(1):395. <https://doi.org/10.1186/1471-2458-9-395> PMID: 19860867
23. Aguiar M, Ballesteros S, Kooi BW, Stollenwerk N. The role of seasonality and import in a minimalistic multi-strain dengue model capturing differences between primary and secondary infections: complex dynamics and its implications for data analysis. *Journal of theoretical biology*. 2011; 289:181–196. <https://doi.org/10.1016/j.jtbi.2011.08.043> PMID: 21907213
24. Andraud M, Hens N, Marais C, Beutels P. Dynamic epidemiological models for dengue transmission: a systematic review of structural approaches. *PloS one*. 2012; 7(11):e49085. <https://doi.org/10.1371/journal.pone.0049085> PMID: 23139836
25. Chan EH, Sahai V, Conrad C, Brownstein JS. Using web search query data to monitor dengue epidemics: a new model for neglected tropical disease surveillance. *PLoS Negl Trop Dis*. 2011; 5(5):e1206. <https://doi.org/10.1371/journal.pntd.0001206> PMID: 21647308
26. Gomide J, Veloso A, Meira Jr W, Almeida V, Benevenuto F, Ferraz F, et al. Dengue surveillance based on a computational model of spatio-temporal locality of Twitter. In: *Proceedings of the 3rd international web science conference*. ACM; 2011. p. 3.
27. Althouse BM, Ng YY, Cummings DAT. Prediction of dengue incidence using search query surveillance. *PLoS Negl Trop Dis*. 2011; 5(8):e1258. <https://doi.org/10.1371/journal.pntd.0001258> PMID: 21829744
28. Milinovich GJ, Williams GM, Clements ACA, Hu W. Internet-based surveillance systems for monitoring emerging infectious diseases. *The Lancet infectious diseases*. 2014; 14(2):160–168. [https://doi.org/10.1016/S1473-3099\(13\)70244-5](https://doi.org/10.1016/S1473-3099(13)70244-5) PMID: 24290841
29. Ginsberg J, Mohebbi MH, Patel RS, Brammer L, Smolinski MS, Brilliant L. Detecting influenza epidemics using search engine query data. *Nature*. 2009; 457(7232):1012–1014. <https://doi.org/10.1038/nature07634> PMID: 19020500
30. Cook S, Conrad C, Fowlkes AL, Mohebbi MH. Assessing Google flu trends performance in the United States during the 2009 influenza virus A (H1N1) pandemic. *PloS one*. 2011; 6(8):e23610. <https://doi.org/10.1371/journal.pone.0023610> PMID: 21886802

31. Olson DR, Konty KJ, Paladini M, Viboud C, Simonsen L. Reassessing Google Flu Trends data for detection of seasonal and pandemic influenza: a comparative epidemiological study at three geographic scales. *PLoS Comput Biol*. 2013; 9(10):e1003256. <https://doi.org/10.1371/journal.pcbi.1003256> PMID: 24146603
32. Copeland P, Romano R, Zhang T, Hecht G, Zigmund D, Stefansen C. Google disease trends: an update. 2013;.
33. Lazer D, Kennedy R, King G, Vespignani A. The parable of Google flu: traps in big data analysis. *Science*. 2014; 343(6176):1203–1205. <https://doi.org/10.1126/science.1248506> PMID: 24626916
34. Santillana M, Zhang DW, Althouse BM, Ayers JW. What can digital disease detection learn from (an external revision to) Google Flu Trends? *American journal of preventive medicine*. 2014; 47(3):341–347. <https://doi.org/10.1016/j.amepre.2014.05.020> PMID: 24997572
35. Yang S, Santillana M, Kou SC. Accurate estimation of influenza epidemics using Google search data via ARGO. *Proceedings of the National Academy of Sciences*. 2015; 112(47):14473–14478. <https://doi.org/10.1073/pnas.1515373112>
36. Pollett S, Boscardin WJ, Azziz-Baumgartner E, Tinoco YO, Soto G, Romero C, et al. Evaluating Google Flu Trends in Latin America: important lessons for the next phase of digital disease detection. *Clinical Infectious Diseases*. 2016; p. ciw657.
37. Santillana M. Perspectives on the future of Internet search engines and biosurveillance systems. *Clinical infectious diseases: an official publication of the Infectious Diseases Society of America*. 2016;.
38. Gluskin RT, Johansson MA, Santillana M, Brownstein JS. Evaluation of Internet-based dengue query data: Google Dengue Trends. *PLoS Negl Trop Dis*. 2014; 8(2):e2713. <https://doi.org/10.1371/journal.pntd.0002713> PMID: 24587465
39. Tibshirani R. Regression shrinkage and selection via the lasso. *Journal of the Royal Statistical Society Series B (Methodological)*. 1996; p. 267–288.
40. Santillana M, Nsoesie EO, Mekaru SR, Scales D, Brownstein JS. Using clinicians' search query data to monitor influenza epidemics. *Clinical Infectious Diseases*. 2014; 59(10):1446–1450. <https://doi.org/10.1093/cid/ciu647> PMID: 25115873
41. Berkman Klein Center for Internet & Society. Internet Monitor; 2017. Available from: <https://thenetmonitor.org/countries/>.
42. Kennedy AF, Hauksson KM. Online Appendix C. In: *Global Search Engine Marketing: Fine-Tuning Your International Search Engine Results*. Que Publishing; 2012. Available from: [http://ptgmedia.pearsoncmg.com/images/9780789747884/supplements/9780789747884\\_appC.pdf](http://ptgmedia.pearsoncmg.com/images/9780789747884/supplements/9780789747884_appC.pdf).
43. The World Bank. Countries and Economies; 2017. Available from: <http://data.worldbank.org/country>.
44. Central Intelligence Agency. The CIA World Factbook; 2017. <https://www.cia.gov/library/publications/the-world-factbook/geos/tw.html>.
45. Yang CF, Hou JN, Chen TH, Chen WJ. Discriminable roles of *Aedes aegypti* and *Aedes albopictus* in establishment of dengue outbreaks in Taiwan. *Acta tropica*. 2014; 130:17–23. <https://doi.org/10.1016/j.actatropica.2013.10.013> PMID: 24161880
46. Wang SF, Chang K, Loh EW, Wang WH, Tseng SP, Lu PL, et al. Consecutive large dengue outbreaks in Taiwan in 2014–2015. *Emerging Microbes & Infections*. 2016; 5(12):e123. <https://doi.org/10.1038/emi.2016.124>
47. Majumder MS, Cohn E, Fish D, Brownstein JS. Estimating a feasible serial interval range for Zika fever. *Bull World Health Organ*. 2016; 10.
48. Santillana M, Nguyen AT, Dredze M, Paul MJ, Nsoesie EO, Brownstein JS. Combining search, social media, and traditional data sources to improve influenza surveillance. *PLoS Comput Biol*. 2015; 11(10):e1004513. <https://doi.org/10.1371/journal.pcbi.1004513> PMID: 26513245
49. McGough SF, Brownstein JS, Hawkins JB, Santillana M. Forecasting Zika Incidence in the 2016 Latin America Outbreak Combining Traditional Disease Surveillance with Search, Social Media, and News Report Data. *PLOS Neglected Tropical Diseases*. 2017; 11(1):e0005295. <https://doi.org/10.1371/journal.pntd.0005295> PMID: 28085877
