# Supplementary material for: Advances in using Internet searches to track dengue
Source: PubMed Central journal article supplement (PMC5519005; doi:10.1371/journal.pcbi.1005607), 2017-07-20
Supplement: pcbi.1005607.s001.pdf [file pcbi.1005607.s001.pdf]

## Advances in using Internet searches to track dengue

Shihao Yang<sup>1</sup>, S. C. Kou<sup>1,\*</sup>, Fred Lu<sup>2</sup>, John S. Brownstein<sup>2,3</sup>, Nicholas Brooke<sup>4</sup>  
Mauricio Santillana<sup>2,3,\*</sup>

**1** Department of Statistics, Harvard University, Cambridge, MA, USA

**2** Computational Health Informatics Program, Boston Children’s Hospital, Boston, MA, USA

**3** Harvard Medical School, Boston, MA, USA

**4** The Synergist, Brussels, Belgium

\* Corresponding authors: msantill@g.harvard.edu; kou@stat.harvard.edu

### Supporting Information

**Table A. Query terms used for each country/state**

| Brazil             | Mexico               | Thailand                  | Singapore              | Taiwan       |
|--------------------|----------------------|---------------------------|------------------------|--------------|
| dengue             | dengue               | โรคไข้เลือดออก            | dengue                 | 登革熱          |
| sintomas.dengue    | dengue.dengue.dengue | อาการ.โรค.ไข้เลือดออก     | dengue.fever           | 登革熱噴藥        |
| mosquito           | el.dengue            | ไข้เลือดออก               | dengue.symptoms        | 出血性登革熱       |
| sintomas.da.dengue | dengue.sintomas      | โรค.ไข้เลือดออก           | dengue.singapore       | 埃及斑蚊         |
| a.dengue           | sintomas.del.dengue  | การ.ป้องกัน.ไข้เลือดออก   | symptoms.dengue.fever  | 登格熱          |
| mosquito.dengue    | dengue.hemorragico   | อาการ.ของ.ไข้เลือดออก     | symptoms.of.dengue     | 防蚊液          |
| mosquito.da.dengue | sintomas.de.dengue   | สาเหตุ.ไข้เลือดออก        | dengue.fever.singapore | 白線斑蚊         |
| dengue.hemorrágica | que.es.dengue        | โครงการ.ไข้เลือดออก       | dengue.mosquito        | 登革樂          |
| sintomas.de.dengue | dengue.clasico       | สถานการณ์.โรค.ไข้เลือดออก | mosquito               | dengue fever |
| sobre.a.dengue     | dengue.mosquito      | สถานการณ์.ไข้เลือดออก     | dengue.in.singapore    | 蚊子叮          |

### ARGO hyper-parameters for each country/state

**Mexico** Since we found the nearest three time lags to have significant predictive effect on future dengue occurrence, we decided not to penalize these three time lags, setting  $\lambda_{\alpha_j} = 0, j = 1, 2, 3$ . We do not have knowledge of the predictive power of the later time lags, so we set a common penalty for all of them  $\lambda_{\alpha_j} = \lambda_{\alpha}, j \geq 4$ . We applied the same argument to the Google search terms. We further set  $\lambda_{\alpha} = \lambda_{\beta}$  to reduce the number of hyper parameters, therefore  $\lambda_{\alpha_k} = \lambda_{\beta_k} = 0$  for  $k = 1, 2, 3, \lambda_{\alpha_j} = \lambda$  for  $j = 4, \dots, 12, 24$ , and  $\lambda_{\beta_k} = \lambda$  for  $k = 4, \dots, 10$ .

**Brazil** We found the same pattern for Brazil as for Mexico. Thus, we set  $\lambda_{\alpha_k} = \lambda_{\beta_k} = 0$  for  $k = 1, 2, 3$ ,  $\lambda_{\alpha_j} = \lambda$  for  $j = 4, \dots, 12, 24$ , and  $\lambda_{\beta_k} = \lambda$  for  $k = 4, \dots, 10$ .

**Thailand** The first three time lags for Thailand were significant, but none of the Google terms by themselves were significant. This observation led us to set the hyper-parameters as  $\lambda_{\alpha_j} = 0$  for  $j = 1, 2, 3$ ,  $\lambda_{\alpha_j} = \lambda$  for  $j = 4, \dots, 12, 24$ , and  $\lambda_{\beta_k} = \lambda$  for  $k = 1, \dots, 10$ .

**Singapore** Singapore showed a similar pattern to Thailand, so we set  $\lambda_{\alpha_j} = 0$  for  $j = 1, 2, 3$ ,  $\lambda_{\alpha_j} = \lambda$  for  $j = 4, \dots, 12, 24$ , and  $\lambda_{\beta_k} = \lambda$  for  $k = 1, \dots, 10$ .

**Taiwan** The same argument applied for Taiwan, so we set  $\lambda_{\alpha_j} = 0$  for  $j = 1, 2, 3$ ,  $\lambda_{\alpha_j} = \lambda$  for  $j = 4, \dots, 12, 24$ , and  $\lambda_{\beta_k} = \lambda$  for  $k = 1, \dots, 10$ .

### Aggregation from weekly data to monthly data

We aggregate the Google Trends data from weekly frequency to monthly frequency using summation. If a fraction of the week belongs to a certain month, the summing value will be that fraction multiplied by the value reported for that week.

### Robustness to Google Trends variation

We include a robustness study to identify the effects of the observed variations in the (input) data acquired from the Google Trends website. For this, we downloaded 11 copies of data on different days in November 2016, and repeated the implementation of the methodology described in the main text. Our findings are presented in Table B. The mean of the 11 evaluation metric values is displayed as well as the standard deviation, in parenthesis. GDT has no variation since it is taken as exogenous in this study. If we had access to the raw data GDT is constructed from, we should expect to see similar variations as well. Autoregressive models do not suffer from these variations since they do not use Google Trends data as input. As expected, ARGO, which combines Google Trends data with time series data, suffers less from the variations of the Google Trends data than the model based on Google Trends data only.

**Table B. Sensitivity to Google Trends variation.** The mean evaluation metric value of the 11 different datasets is displayed in the table, as well as the the standard deviation. All values are absolute.

|                  | RMSE                | MAE                 | RMSPE        | MAPE         | CORR         |
|------------------|---------------------|---------------------|--------------|--------------|--------------|
| <b>Brazil</b>    |                     |                     |              |              |              |
| ARGO             | 14602.591(1303.123) | 9043.447(746.341)   | 0.329(0.029) | 0.234(0.014) | 0.957(0.008) |
| GDT              | 20349.593(0)        | 13725.535(0)        | 0.692(0)     | 0.446(0)     | 0.916(0)     |
| GT               | 31606.088(3458.28)  | 20243.862(1716.244) | 0.821(0.07)  | 0.565(0.043) | 0.815(0.04)  |
| SAR              | 20158.471(0)        | 12215.217(0)        | 0.467(0)     | 0.318(0)     | 0.917(0)     |
| SAR+GDT          | 19220.295(0)        | 12732.517(0)        | 0.397(0)     | 0.306(0)     | 0.938(0)     |
| naive            | 30560.436(0)        | 21677.634(0)        | 0.703(0)     | 0.546(0)     | 0.812(0)     |
| <b>Mexico</b>    |                     |                     |              |              |              |
| ARGO             | 2695.046(145.838)   | 1532.008(79.432)    | 0.516(0.063) | 0.355(0.025) | 0.903(0.011) |
| GDT              | 3370.184(0)         | 2076.24(0)          | 1.036(0)     | 0.645(0)     | 0.863(0)     |
| GT               | 4628.805(456.821)   | 2528.918(208.179)   | 1.016(0.13)  | 0.616(0.045) | 0.705(0.065) |
| SAR              | 2821.504(0)         | 1593.552(0)         | 0.633(0)     | 0.401(0)     | 0.911(0)     |
| SAR+GDT          | 4460.343(0)         | 2131.342(0)         | 0.635(0)     | 0.42(0)      | 0.891(0)     |
| naive            | 3570.105(0)         | 2161.018(0)         | 0.816(0)     | 0.492(0)     | 0.833(0)     |
| <b>Thailand</b>  |                     |                     |              |              |              |
| ARGO             | 1543.473(129.498)   | 911.561(43.288)     | 0.303(0.014) | 0.23(0.008)  | 0.925(0.011) |
| GDT              | 1811.26(0)          | 1107.728(0)         | 0.636(0)     | 0.419(0)     | 0.884(0)     |
| GT               | 2590.984(499.302)   | 1582.48(134.678)    | 0.687(0.068) | 0.495(0.04)  | 0.82(0.05)   |
| SAR              | 1592.675(0)         | 1066.51(0)          | 0.386(0)     | 0.293(0)     | 0.917(0)     |
| SAR+GDT          | 2381.833(0)         | 1253.851(0)         | 0.393(0)     | 0.305(0)     | 0.903(0)     |
| naive            | 2058.891(0)         | 1276.068(0)         | 0.426(0)     | 0.326(0)     | 0.852(0)     |
| <b>Singapore</b> |                     |                     |              |              |              |
| ARGO             | 309.492(24.395)     | 185.639(7.578)      | 0.282(0.011) | 0.22(0.005)  | 0.895(0.014) |
| GDT              | 389.389(0)          | 260.421(0)          | 0.404(0)     | 0.331(0)     | 0.821(0)     |
| GT               | 362.286(30.443)     | 246.596(13.725)     | 0.398(0.019) | 0.323(0.017) | 0.866(0.031) |
| SAR              | 379.794(0)          | 223.633(0)          | 0.33(0)      | 0.25(0)      | 0.847(0)     |
| SAR+GDT          | 807.414(0)          | 262.783(0)          | 0.336(0)     | 0.232(0)     | 0.775(0)     |
| naive            | 329.318(0)          | 202.651(0)          | 0.283(0)     | 0.23(0)      | 0.878(0)     |
| <b>Taiwan</b>    |                     |                     |              |              |              |
| ARGO             | 2919.016(1284.247)  | 989.77(258.632)     | 0.846(0.154) | 0.628(0.062) | 0.873(0.026) |
| GT               | 5031.846(7248.156)  | 1336.656(1157.202)  | 4.092(1.126) | 1.655(0.272) | 0.848(0.062) |
| SAR              | 4487.372(0)         | 1485.911(0)         | 0.801(0)     | 0.653(0)     | 0.878(0)     |
| naive            | 2422.559(0)         | 1063.597(0)         | 3.248(0)     | 1.601(0)     | 0.734(0)     |

## Sensitivity to the availability of dengue case count in the past month

### Formulation of ARGO and benchmark models assuming past month dengue case count is not available

**ARGO model** We now define the ARGO model as in equation (1) of main text, but we set  $J = \{2, \dots, 12\} \cup \{24\}$  assuming that the most recent month data is not yet available. We take the same  $K = 10$ , which includes the query search frequencies of both the current and the previous month. The slightly refined model is outlined below.

$$y_t = \mu_y + \sum_{j \in J} \alpha_j y_{t-j} + \sum_{k \in K} \beta_{k,0} X_{k,t} + \sum_{k \in K} \beta_{k,1} X_{k,t-1} + \epsilon_t, \quad \epsilon_t \stackrel{iid}{\sim} \mathcal{N}(0, \sigma^2), \quad (1)$$

The same  $L_1$  regularization is imposed to minimize the number of parameters as stated in the ARGO parameter estimation section. In a given month, the goal is to find parameters  $\mu_y$ ,  $\alpha = \{\alpha_j : j \in J\}$ , and  $\beta = (\beta_{1,0}, \dots, \beta_{10,0}, \beta_{1,1}, \dots, \beta_{10,1})$  that minimize

$$\sum_t \left( y_t - \mu_y - \sum_{j \in J} \alpha_j y_{t-j} - \sum_{k=1}^{10} \beta_{k,0} X_{k,t} - \sum_{k=1}^{10} \beta_{k,1} X_{k,t-1} \right)^2 + \sum_{j \in J} \lambda_{\alpha_j} |\alpha_j| + \sum_{k=1}^{10} \lambda_{\beta_k} |\beta_{k,0}| + \sum_{k=1}^{10} \lambda_{\beta_k} |\beta_{k,1}|$$

where  $\lambda_{\alpha_j}, \lambda_{\beta_k}$  are regularization hyper-parameters. For Brazil, Mexico, and Thailand, we set  $\lambda_{\alpha_k} = \lambda_{\beta_k} = 0$  for  $k = 2, 3$ ,  $\lambda_{\alpha_j} = \lambda$  for  $j = 4, \dots, 12, 24$ , and  $\lambda_{\beta_k} = \lambda_{\beta_1} = \lambda$  for  $k = 4, \dots, 10$ . For Singapore and Taiwan, we set  $\lambda_{\alpha_k} = 0$  for  $k = 2, 3$ ,  $\lambda_{\alpha_j} = \lambda$  for  $j = 4, \dots, 12, 24$ , and  $\lambda_{\beta_k} = \lambda$  for  $k = 1, \dots, 10$ .

**Benchmark models** For comparison with ARGO, the benchmark models also assume dengue case count of the most recent month not available:

1. A seasonal autoregressive model without Google information, denoted as SAR, using a time series of the most recent 3 months (i.e., 2 lags, because most recent month is not available), as well as 2 seasonal lags. Specifically, the monthly time series model is comprised of time lags 2,3,12,24:  

$$y_t = \alpha_2 y_{t-2} + \alpha_3 y_{t-3} + \alpha_{12} y_{t-12} + \alpha_{24} y_{t-24} + \epsilon_t, \quad \epsilon_t \sim \mathcal{N}(0, \sigma^2).$$
This model serves as a baseline for estimations made only using dengue time-series information.
2. Google Dengue Trends [25], which ended in August 2015. Data are obtained from <https://www.google.org/flutrends/about/>. Because Google Dengue Trends reported dengue intensity in a scale from 0 to 1, we dynamically rescaled it using a sliding training window to recreate case estimates.
3. A penalized multivariate linear regression model with Google Trends information only [34], denoted as GT. This is essentially ARGO without autoregressive lags, and incorporates a common  $L_1$  penalty on the Google Trends data of current month and most recent month;

4. A seasonal autoregressive model *with* Google Dengue Trends as exogenous variable, denoted as SAR+GDT.

$$y_t = \alpha_2 y_{t-2} + \alpha_3 y_{t-3} + \alpha_{12} y_{t-12} + \alpha_{24} y_{t-24} + \beta_1 \log \text{GDT}_t + \beta_2 \log \text{GDT}_{t-1} + \epsilon_t, \\ \epsilon_t \sim \mathcal{N}(0, \sigma^2).$$

5. A naive method, which simply uses the case count two months ago as the estimation for the value of the current month.

All benchmark models (except the naive method) were trained by linear regression with sliding two year windows for fair comparison.

### **Performance comparison**

As shown in Table C, ARGO has almost uniform outperformance to other benchmark models except in Taiwan. The performance of ARGO is similar to our finding in the main text, suggesting that the method is robust to the availability schedule of the ground truth data of dengue case count.

**Table C. Comparison of ARGO to benchmark models assuming past month dengue case count is not available**

|                  | RMSE                | MAE                 | RMSPE        | MAPE         | CORR         |
|------------------|---------------------|---------------------|--------------|--------------|--------------|
| <b>Brazil</b>    |                     |                     |              |              |              |
| ARGO             | <b>0.357</b>        | <b>0.321</b>        | <b>0.260</b> | <b>0.285</b> | <b>0.927</b> |
| GDT              | 0.419               | 0.372               | 0.370        | 0.364        | 0.897        |
| GT               | 0.525               | 0.470               | 0.351        | 0.394        | 0.866        |
| SAR              | 0.692               | 0.569               | 0.530        | 0.491        | 0.762        |
| SAR+GDT          | 0.826               | 0.591               | 0.379        | 0.410        | 0.810        |
| naive            | 1 (54101.159)       | 1 (40214.762)       | 1 (1.938)    | 1 (1.285)    | 0.423        |
| <b>Mexico</b>    |                     |                     |              |              |              |
| ARGO             | <b>0.524</b>        | <b>0.536</b>        | <b>0.389</b> | <b>0.527</b> | <b>0.872</b> |
| GDT              | 0.583               | 0.593               | 0.539        | 0.620        | 0.833        |
| GT               | 0.647               | 0.593               | 0.573        | 0.588        | 0.790        |
| SAR              | 0.737               | 0.756               | 0.946        | 0.883        | 0.684        |
| SAR+GDT          | 2.033               | 1.192               | 0.846        | 0.804        | 0.711        |
| naive            | 1 (6231.484)        | 1 (3900.929)        | 1 (2.013)    | 1 (1.089)    | 0.495        |
| <b>Thailand</b>  |                     |                     |              |              |              |
| ARGO             | <b>0.417</b>        | <b>0.450</b>        | <b>0.466</b> | <b>0.484</b> | <b>0.936</b> |
| GDT              | 0.519               | 0.519               | 0.792        | 0.730        | 0.877        |
| GT               | 1.432               | 1.045               | 1.014        | 0.917        | 0.804        |
| SAR              | 0.907               | 0.962               | 1.203        | 1.060        | 0.641        |
| SAR+GDT          | 1.090               | 0.847               | 0.743        | 0.749        | 0.847        |
| naive            | 1 (3647.191)        | 1 (2267.333)        | 1 (0.832)    | 1 (0.607)    | 0.532        |
| <b>Singapore</b> |                     |                     |              |              |              |
| ARGO             | <b>0.748</b>        | <b>0.778</b>        | <b>0.790</b> | 0.836        | <b>0.835</b> |
| GDT              | 0.782               | 0.875               | 0.899        | 0.979        | 0.809        |
| GT               | 1.421               | 0.904               | 0.812        | <b>0.819</b> | 0.765        |
| SAR              | 1.432               | 1.433               | 1.590        | 1.407        | 0.491        |
| SAR+GDT          | 2.634               | 1.264               | 1.144        | 0.964        | 0.621        |
| naive            | 1 (513.588)         | 1 (312.989)         | 1 (0.463)    | 1 (0.353)    | 0.704        |
| <b>Taiwan</b>    |                     |                     |              |              |              |
| ARGO             | 4.371               | 2.477               | 0.086        | 0.144        | <b>0.900</b> |
| GT               | 30.431              | 13.435              | 0.502        | 0.436        | 0.721        |
| SAR              | 2.238               | 1.429               | <b>0.062</b> | <b>0.119</b> | 0.594        |
| naive            | <b>1 (3691.033)</b> | <b>1 (1895.974)</b> | 1 (21.261)   | 1 (8.280)    | 0.395        |

## Heatmaps of ARGO coefficients

Figure A. Dynamic ARGO coefficients for Brazil.



Figure B. Dynamic ARGO coefficients for Mexico.





**Figure C.** Dynamic ARGO coefficients for Thailand. The ten query terms are listed in Table A



Figure D. Dynamic ARGO coefficients for Singapore.



**Figure E.** Dynamic ARGO coefficients for Taiwan. The ten query terms are listed in Table A
